# Supplementary material for: Perceived Access to Health Care Services and Relevance of Telemedicine during the COVID-19 Pandemic in Germany
Source: MDPI journal article supplement (doi:10.3390/ijerph18147661), 2021-07-19
Supplement: s1 [file s1]

# Perceived Access to Health Care Services and Relevance of Telemedicine during the COVID-19 Pandemic in Germany

Lukas Reitzle <sup>1,\*</sup>, Christian Schmidt <sup>1</sup>, Francesca Färber <sup>1</sup>, Lena Huebl <sup>2,3</sup>, Lothar Heinz Wieler <sup>4</sup>, Thomas Ziese <sup>1</sup> and Christin Heidemann <sup>1</sup>

<sup>1</sup> Department of Epidemiology and Health Monitoring, Robert Koch Institute, 12101 Berlin, Germany; SchmidtChri@rki.de (C.S.); FaerberF@rki.de (F.F.); ZieseT@rki.de (T.Z.); HeidemannC@rki.de (C.H.)

<sup>2</sup> Department of Tropical Medicine, Bernhard Nocht Institute for Tropical Medicine, University Medical Center Hamburg-Eppendorf, 20359 Hamburg, Germany; l.huebl@uke.de

<sup>3</sup> I. Department of Medicine, University Medical Center Hamburg-Eppendorf, 20251 Hamburg, Germany

<sup>4</sup> Robert Koch Institute, 13353 Berlin, Germany; WielerLH@rki.de

\* Correspondence: reitzlel@rki.de

**Figure S1.** Forest plot of logistic regression model for perceived availability of medical services (0 = no, not available; 1 = yes, available)

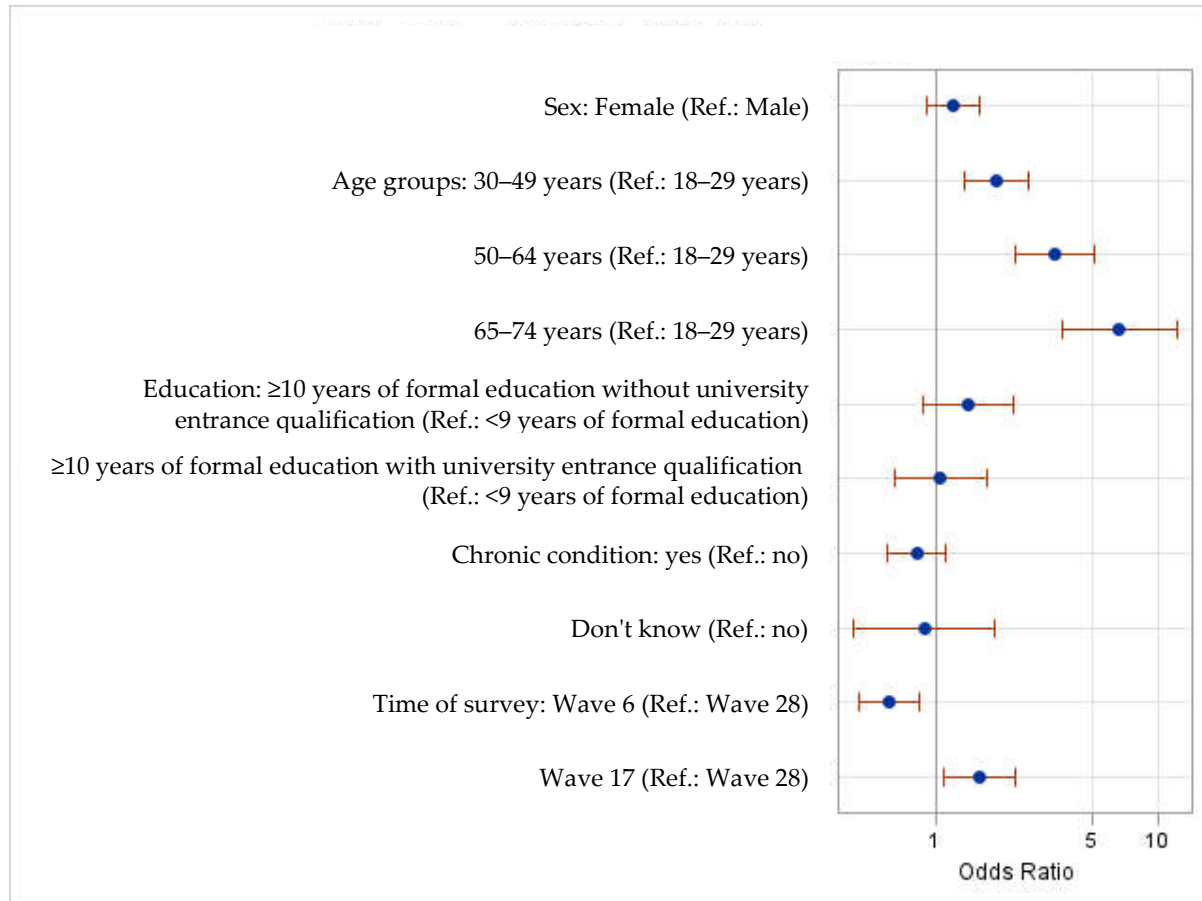

**Table S1.** Composition of study population compared to the German population regarding age and sex

|             | <b>Wave 6</b><br><b>April 2020</b><br><b>(n = 773)</b> | <b>Wave 17</b><br><b>July 2020</b><br><b>(n = 941)</b> | <b>Wave 28</b><br><b>December 2020</b><br><b>(n = 868)</b> | <b>All three</b><br><b>waves</b> | <b>German</b><br><b>Population*</b> |
|-------------|--------------------------------------------------------|--------------------------------------------------------|------------------------------------------------------------|----------------------------------|-------------------------------------|
|             | <i>n (%)</i>                                           | <i>n (%)</i>                                           | <i>n (%)</i>                                               | <i>n (%)</i>                     | <i>n (%)</i>                        |
| Male        |                                                        |                                                        |                                                            |                                  |                                     |
| 18–29 years | 58 (14.9)                                              | 90 (19.8)                                              | 72 (17.4)                                                  | 220 (17.5)                       | 5,781,592 (19.5)                    |
| 30–49 years | 147 (37.9)                                             | 151 (33.2)                                             | 157 (37.9)                                                 | 455 (36.2)                       | 11,520,095 (38.9)                   |
| 50–64 years | 115 (29.6)                                             | 129 (28.4)                                             | 120 (29.0)                                                 | 364 (29.0)                       | 8,081,342 (27.3)                    |
| 65–74 years | 68 (17.5)                                              | 85 (18.7)                                              | 65 (15.7)                                                  | 218 (17.3)                       | 4,246,483 (14.3)                    |
| Female      |                                                        |                                                        |                                                            |                                  |                                     |
| 18–29 years | 69 (17.9)                                              | 87 (17.9)                                              | 82 (18.1)                                                  | 238 (18.0)                       | 5,611,399 (18.7)                    |
| 30–49 years | 148 (38.4)                                             | 185 (38.1)                                             | 169 (37.2)                                                 | 502 (37.9)                       | 11,325,577 (37.8)                   |
| 50–64 years | 104 (27.0)                                             | 137 (28.2)                                             | 130 (28.6)                                                 | 371 (28.0)                       | 8,247,217 (27.5)                    |
| 65–74 years | 64 (16.6)                                              | 77 (15.8)                                              | 73 (16.1)                                                  | 214 (16.2)                       | 4,788,107 (16.0)                    |

\* German Population based on data from the 2011 census [1]

**Table S2.** Parameter estimates of logistic regression model for perceived availability of medical services (0 = no, not available; 1 = yes, available)

| <b>Parameter</b>                                                        | <b>Estimate</b> | <b>Standard error</b> | <b>p-value</b> |
|-------------------------------------------------------------------------|-----------------|-----------------------|----------------|
| Intercept                                                               | 1.3686          | 0.2802                | < 0.0001       |
| Sex                                                                     |                 |                       |                |
| Male                                                                    | Ref             |                       |                |
| Female                                                                  | 0.1801          | 0.1403                | 0.1993         |
| Age groups                                                              |                 |                       |                |
| 18–29 years                                                             | Ref             |                       |                |
| 30–49 years                                                             | 0.6254          | 0.1718                | 0.0003         |
| 50–64 years                                                             | 1.2216          | 0.2105                | < 0.0001       |
| 65–74 years                                                             | 1.8942          | 0.3048                | < 0.0001       |
| Education                                                               |                 |                       |                |
| ≤9 years of formal education                                            | Ref             |                       |                |
| ≥10 years of formal education without university entrance qualification | 0.3338          | 0.2399                | 0.1641         |
| ≥10 years of formal education with university entrance qualification    | 0.0497          | 0.2453                | 0.8396         |
| Chronic condition                                                       |                 |                       |                |
| No                                                                      | Ref             |                       |                |
| Yes                                                                     | -0.1985         | 0.1524                | 0.1927         |
| Don't know                                                              | -0.1196         | 0.3722                | 0.7480         |
| Time of survey                                                          |                 |                       |                |
| Wave 6 – April 2020                                                     | -0.4848         | 0.1631                | 0.0030         |
| Wave 17 – July 2020                                                     | 0.4510          | 0.1857                | 0.0152         |
| Wave 28 – December 2020                                                 | Ref             |                       |                |

**Table S3.** Proportion of utilization of telemedicine among participants requiring medical appointments stratified by sex, age, education, chronic condition, and perceived availability of medical appointments (wave 28,  $n = 868$ )

|                                                                         | Telephone consultation |          | Video consultation |          | No               |          | Not needed       |          |
|-------------------------------------------------------------------------|------------------------|----------|--------------------|----------|------------------|----------|------------------|----------|
|                                                                         | % (95%-CI)             | <i>n</i> | % (95%-CI)         | <i>n</i> | % (95%-CI)       | <i>n</i> | % (95%-CI)       | <i>n</i> |
| Overall                                                                 | 15.4 (13.2–18.0)       | 134      | 7.6 (6.0–9.6)      | 66       | 63.7 (60.4–66.9) | 553      | 20.6 (18.1–23.4) | 179      |
| Sex                                                                     |                        |          |                    |          |                  |          |                  |          |
| Male                                                                    | 19.8 (16.2–23.9)       | 82       | 10.4 (7.8–13.7)    | 43       | 59.9 (55.1–64.5) | 248      | 20.0 (16.5–24.2) | 83       |
| Female                                                                  | 11.5 (8.8–14.7)        | 52       | 5.1 (3.4–7.5)      | 23       | 67.2 (62.7–71.4) | 305      | 21.1 (17.6–25.2) | 96       |
| Age groups                                                              |                        |          |                    |          |                  |          |                  |          |
| 18–29 years                                                             | 17.5 (12.3–24.4)       | 27       | 15.6 (10.7–22.2)   | 24       | 53.2 (45.3–61.0) | 82       | 24.7 (18.5–32.1) | 38       |
| 30–49 years                                                             | 17.8 (14.0–22.3)       | 58       | 8.9 (6.2–12.5)     | 29       | 60.1 (54.7–65.3) | 196      | 23.0 (18.7–27.9) | 75       |
| 50–64 years                                                             | 10.8 (7.5–15.3)        | 27       | 4.0 (2.2–7.3)      | 10       | 71.2 (65.3–76.5) | 178      | 18.0 (13.7–23.3) | 45       |
| 65–74 years                                                             | 15.9 (10.7–23.0)       | 22       | 2.2 (0.7–6.5)      | 3        | 70.3 (62.1–77.3) | 97       | 15.2 (10.1–22.2) | 21       |
| Education                                                               |                        |          |                    |          |                  |          |                  |          |
| ≤9 years of formal education                                            | 12.4 (7.3–20.2)        | 13       | 2.9 (0.9–8.5)      | 3        | 72.4 (63.1–80.1) | 76       | 22.9 (15.8–31.9) | 24       |
| ≥10 years of formal education without university entrance qualification | 15.2 (11.5–19.8)       | 44       | 6.2 (3.9–9.6)      | 18       | 67.6 (62.0–72.7) | 196      | 17.2 (13.3–22.0) | 50       |
| ≥10 years of formal education with university entrance qualification    | 16.3 (13.2–19.9)       | 77       | 9.5 (7.2–12.5)     | 45       | 59.4 (54.9–63.8) | 281      | 22.2 (18.7–26.2) | 105      |
| Chronic condition                                                       |                        |          |                    |          |                  |          |                  |          |
| Yes                                                                     | 14.0 (10.6–18.3)       | 45       | 5.6 (3.6–8.7)      | 18       | 73.2 (68.1–77.8) | 235      | 11.5 (8.5–15.5)  | 37       |
| No                                                                      | 16.6 (13.6–20.0)       | 86       | 9.1 (6.9–11.9)     | 47       | 57.4 (53.1–61.6) | 298      | 26.6 (23.0–30.6) | 138      |
| Don't know                                                              | 10.7 (3.5–28.5)        | 3        | 3.6 (0.5–21.5)     | 1        | 71.4 (52.4–85.0) | 20       | 14.3 (5.5–32.5)  | 4        |
| Access to medical appointments ensured                                  |                        |          |                    |          |                  |          |                  |          |
| Yes                                                                     | 15.0 (12.7–17.7)       | 119      | 6.1 (4.6–8.0)      | 48       | 64.9 (61.5–68.2) | 514      | 21.5 (18.7–24.5) | 170      |
| No                                                                      | 19.7 (12.3–30.2)       | 15       | 23.7 (15.4–34.5)   | 18       | 51.3 (40.2–62.3) | 39       | 11.8 (6.3–21.2)  | 9        |

95%-CI: 95% Confidence interval

## References

1. Federal Statistical Office. Population (2011 Census): Germany, reference date, sex, age groups. Table 12111-0004. Available online: <https://www-genesis.destatis.de/genesis//online?operation=table&code=12111-0004> (accessed on 14 July 2021).
